# Supplementary material for: A Neurotrophic Mechanism Directs Sensory Nerve Transit in Cranial Bone
Source: PubMed Central journal article supplement — Cell Rep. Author manuscript; Available in PMC 2020 Jul 5. (PMC7335423; doi:10.1016/j.celrep.2020.107696), 2020-05-26
Supplement: NIHMS1598120-supplement-1.pdf [file NIHMS1598120-supplement-1.pdf]

**Cell Reports, Volume 31**

## **Supplemental Information**

### **A Neurotrophic Mechanism Directs**

### **Sensory Nerve Transit in Cranial Bone**

**Carolyn A. Meyers, Seungyong Lee, Takashi Sono, Jiajia Xu, Stefano Negri, Ye Tian, Yiyun Wang, Zhu Li, Sarah Miller, Leslie Chang, Yongxing Gao, Liliana Minichiello, Thomas L. Clemens, and Aaron W. James**

Supplemental Items

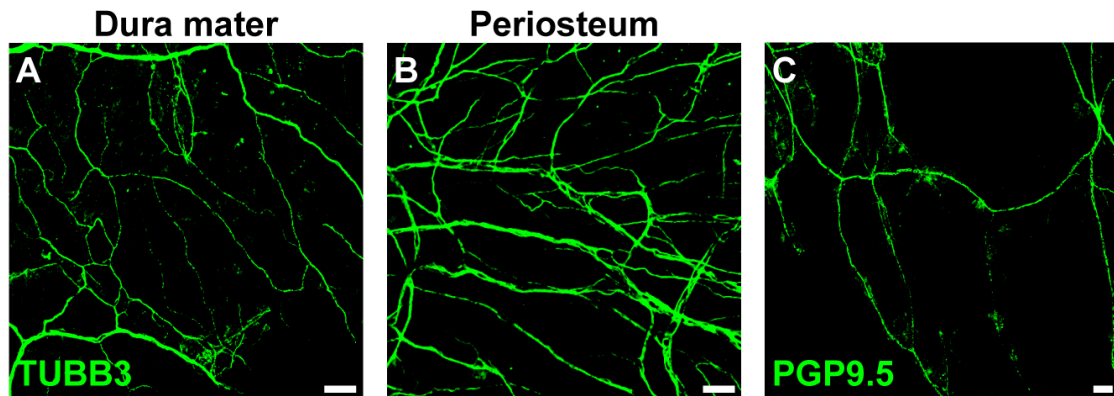

**Supplemental Figure S1. Presence of TUBB3<sup>+</sup>PGP9.5<sup>+</sup> nerves within the dura mater and periosteum of the uninjured calvaria, related to Figure 1.** Whole mount anti-TUBB3 immunofluorescence of the uninjured frontal bone visualized from below and above. TUBB3<sup>+</sup> nerves are present in the intact coverings of the frontal bone, including (A) dura mater and (B) periosteum lining the uninjured bone. (C) Whole mount anti-PGP9.5 immunofluorescence of uninjured frontal bone visualized from below. White scale bar: 50  $\mu$ m.

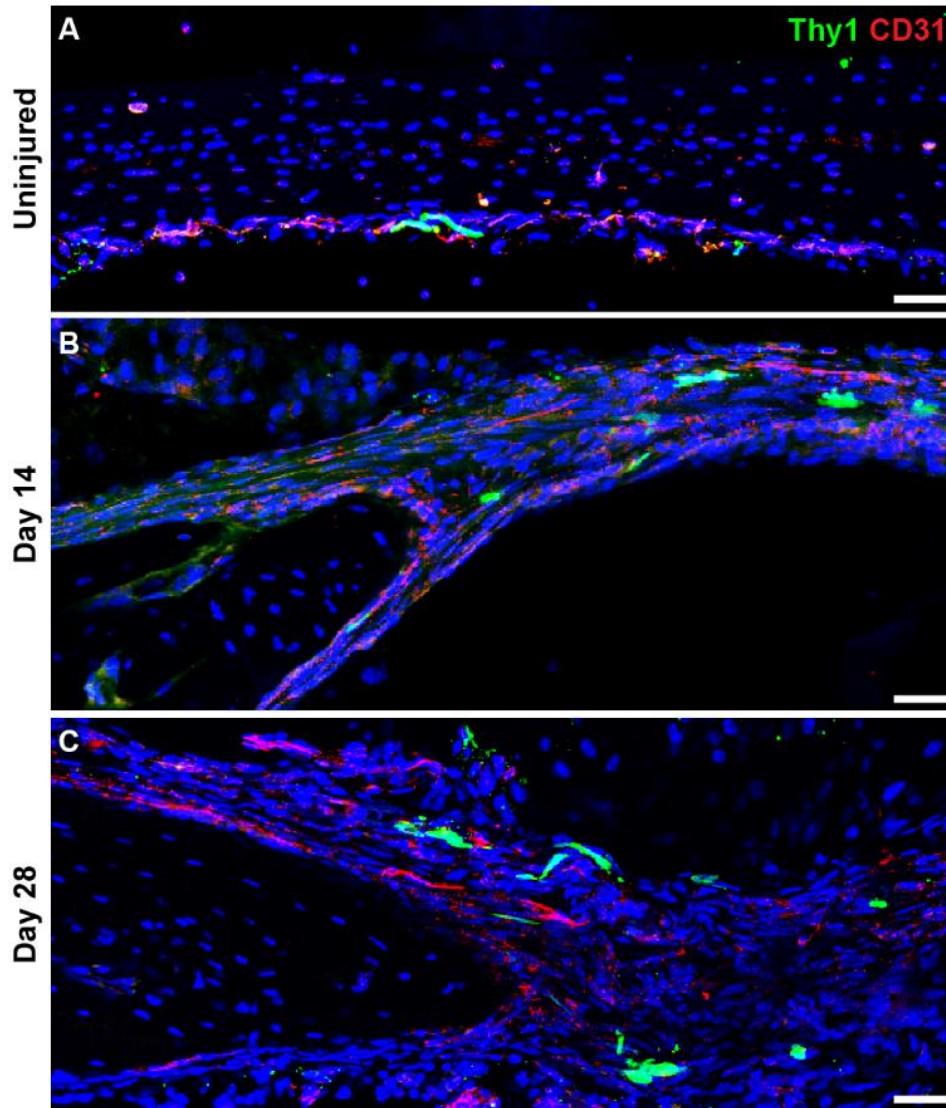

**Supplemental Figure S2. Nerve fibers closely associate with blood vessels before and after calvarial injury, related to Figure 4.** Immunohistochemical staining for CD31 (appearing red) was performed on calvarial sections of Thy1-YFP pan-neuronal reporter animals, before and after bone defects. CD31<sup>+</sup> vessels appear red, while YFP<sup>+</sup> nerve fibers appear green. **(A)** Uninjured frontal bone, focusing on the periosteum. **(B)** Appearance 14 d post-injury, focusing on the bone defect edge. **(C)** Appearance 28 d post-injury, focusing on the bone defect edge. White scale bar: 50  $\mu$ m.

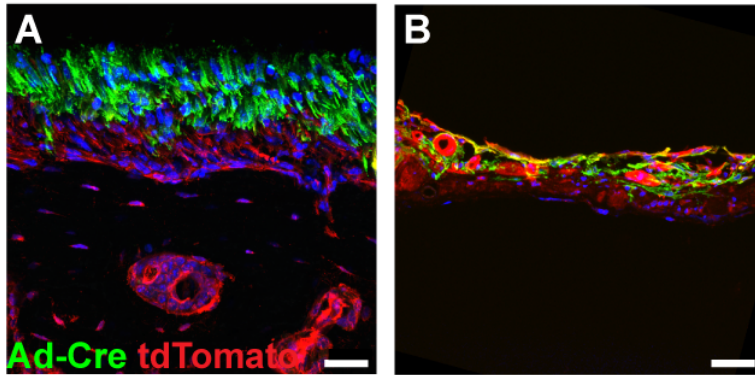

**Supplemental Figure S3. Validation of Cre-recombination in calvarial defect following injection of Ad-Cre, related to Figure 5.** High magnification images following percutaneous Ad-Cre viral injection within the (A) uninjured calvaria and (B) 48 h after bone defect creation in an mT/mG mouse. Cells with Cre-mediated recombination appear green, while all other cells appear red. White scale bar: 50  $\mu$ m.

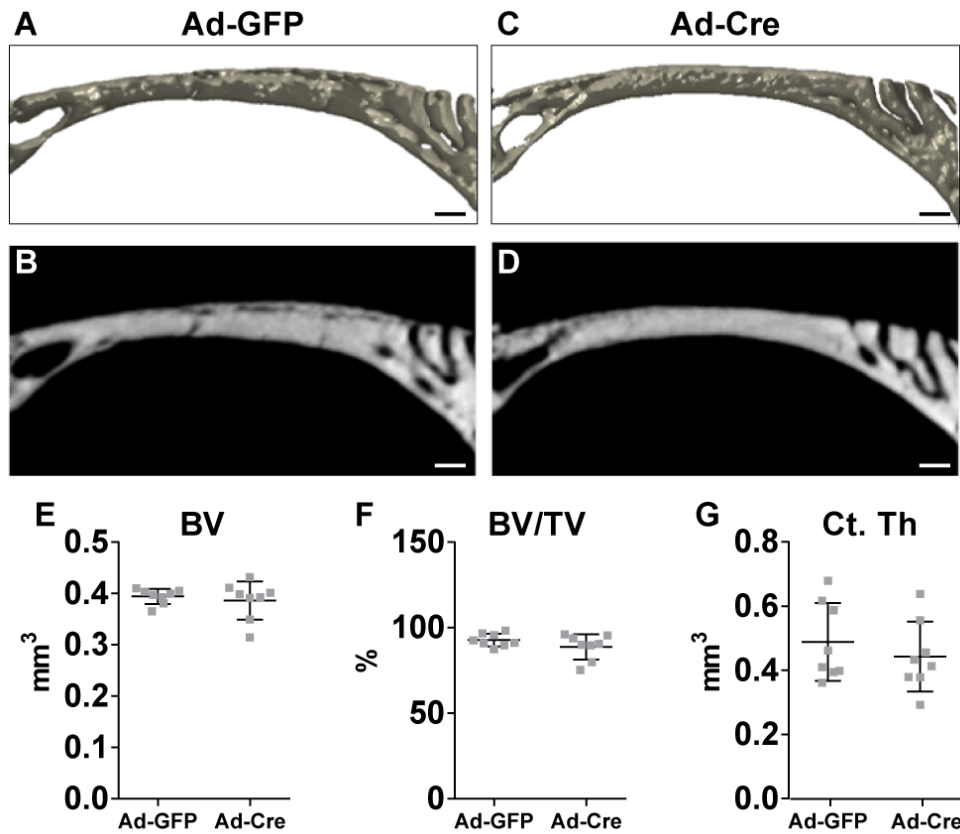

**Supplemental Figure S4. Lack of uninjured calvarial bone phenotype in Ad-Cre treated NGF<sup>fl/fl</sup> animals, related to Figure 5.** Analysis of uninjured frontal bones among NGF<sup>fl/fl</sup> mice treated with Ad-Cre or Ad-GFP control. Analysis performed after 28 d. (A-D)  $\mu$ CT images of uninjured frontal bone among (A,B) Ad-GFP or (C,D) Ad-Cre injected animals, including three dimensional  $\mu$ CT coronal reconstruction (above) and coronal cross-section (below). (E-G) Quantitative  $\mu$ CT analysis of the frontal bone among Ad-GFP or Ad-Cre treated animals, including (E) Bone Volume (BV), (F) Bone Volume/Tissue Volume (BV/TV) and (G) Cortical Thickness (Ct. Th). For all graphs, each dot represents a single animal; N=8 per group. Black and white scale bars: 200  $\mu$ m.

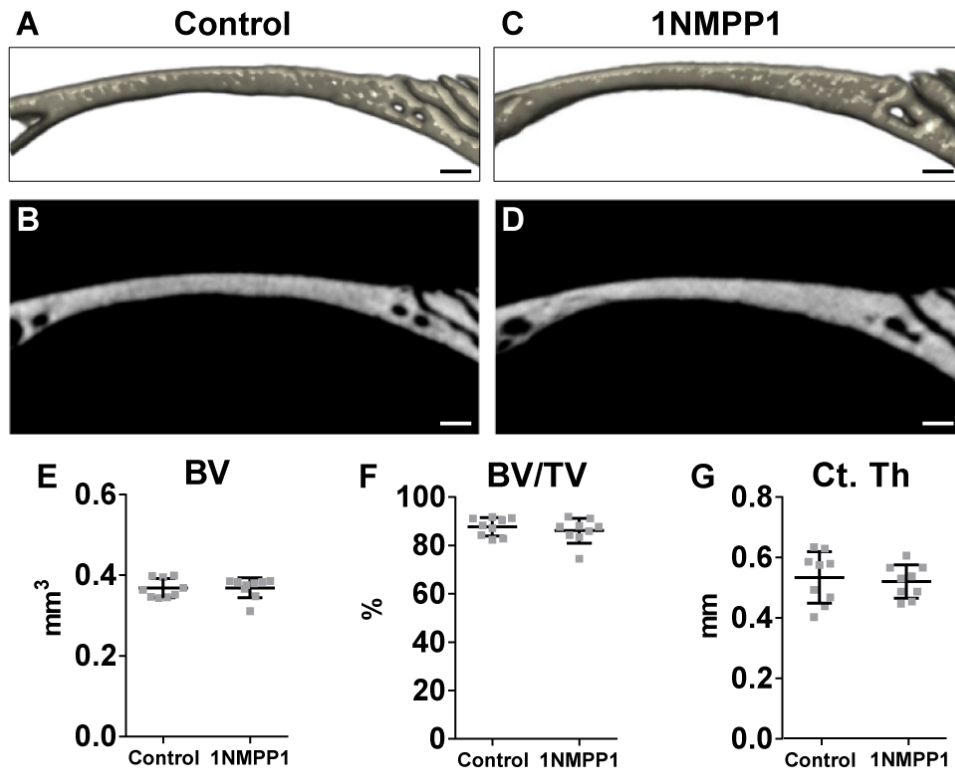

**Supplemental Figure S5. Lack of uninjured calvarial bone phenotype in 1NMPP1-treated  $\text{TrkA}^{\text{F592A}}$  animals, related to Figure 7.** Analysis of uninjured frontal bones among  $\text{TrkA}^{\text{F592A}}$  mice treated with 1NMPP1 or vehicle control for 28 d. (A-D)  $\mu\text{CT}$  images of uninjured frontal bone among  $\text{TrkA}^{\text{F592A}}$  mice treated with (A,B) vehicle control or (C,D) 1NMPP1, including three dimensional coronal  $\mu\text{CT}$  reconstruction (above) and coronal cross-section (below). (E-G) Quantitative  $\mu\text{CT}$  analysis of the frontal bone among  $\text{TrkA}^{\text{F592A}}$  mice treated with 1NMPP1 or vehicle control, including (E) Bone Volume (BV), (F) Bone Volume/ Tissue Volume (BV/TV) and (G) Cortical Thickness (Ct. Th). For all graphs, each dot represents a single animal; N=9 per group. Black and white scale bars: 200  $\mu\text{m}$ .

**Supplemental Table S1: Antibodies used, related to STAR Methods.**

| <b>Name</b>                         | <b>Vendor</b>  | <b>Catalog No.</b> | <b>Concentration</b> | <b>Use</b> |
|-------------------------------------|----------------|--------------------|----------------------|------------|
| Anti-Axin2                          | Abcam          | ab109307           | 1:200                | IF         |
| Anti-CD31                           | Abcam          | ab28364            | 1:100                | IF         |
| Anti-CD45                           | BioLegend      | 103144             | 1:200                | IF         |
| Anti-CGRP                           | Sigma Aldrich  | C8198              | 1:200                | IF         |
| Anti-F4/80                          | Abcam          | ab204467           | 1:200                | IF         |
| Anti-Gli1                           | Abcam          | ab49314            | 1:200                | IF         |
| Anti-I $\kappa$ B $\alpha$          | Cell Signaling | 9936T              | 1:1000               | WB         |
| Anti-IKK $\alpha$                   | Cell Signaling | 9936T              | 1:1000               | WB         |
| Anti-IKK $\beta$                    | Cell Signaling | 9936T              | 1:1000               | WB         |
| Anti-IL1 $\beta$                    | Abcam          | ab9722             | 1:100                | IF         |
| Anti-NF- $\kappa$ B p65             | Cell Signaling | 9936T              | 1:1000               | WB         |
| Anti-NGF                            | Abcam          | ab6199             | 1:100                | IF         |
| Anti-Osteocalcin                    | Abcam          | ab93876            | 1:200                | IF         |
| Anti-PDGFR $\alpha$                 | Abcam          | ab15501            | N/A                  | IF         |
| Anti-PGP 9.5                        | Agilent Tech.  | Z511601-2          | 1:200                | IF         |
| Anti-Phospho- I $\kappa$ B $\alpha$ | Cell Signaling | 9936T              | 1:1000               | WB         |
| Anti-Phospho-IKK $\alpha/\beta$     | Cell Signaling | 9936T              | 1:1000               | WB         |
| Anti-Phospho-NF- $\kappa$ B p65     | Cell Signaling | 9936T              | 1:1000               | WB         |
| Anti-TH                             | EMD Millipore  | AB152              | 1:200                | IF         |
| Anti-TNF $\alpha$                   | Abcam          | ab6671             | 1:100                | IF         |
| Anti-TUBB3                          | Abcam          | ab18207            | 1:1500               | IF         |
| Goat Anti-Mouse IgG                 | Abcam          | ab150119           | 1:200                | IF         |
| Goat-Anti-Rabbit IgG                | Cell Signaling | 9936T              | 1:1500               | WB         |
| Goat Anti-Rabbit IgG                | Vector         | DI-1594            | 1:200                | IF         |
| Horse Anti-Mouse IgG                | Cell Signaling | 9936T              | 1:1500               | WB         |
